# Supplementary material for: Cold protection allows local cryotherapy in a clinical-relevant model of traumatic optic neuropathy
Source: eLife. 2022 Mar 30;11:e75070. doi: 10.7554/eLife.75070 (PMC9068221; doi:10.7554/eLife.75070)
Supplement: Figure 1—figure supplement 1—source data 1. [file elife-75070-fig1-figsupp1-data1.xlsx]

## Sheet: Figure S1A
Q1-OD	术前（20190729）	术后4周（20190903）	术后8周（20190926）	术后12周（20191029）			OD-CL
G	263	259	263	254			OS-sham surgery
NS	418	427	412	426
N	221	213	221	214
NI	327	330	346	314
TI	200	201	219	198
T	222	213	216	208
TS	274	264	252	251
Q1-OS	术前（20190729）	术后4周（20190903）	术后8周（20190926）	术后12周（20191029）
G	264	268	252	257
NS	350	367	327	330
N	219	211	209	218
NI	294	299	287	291
TI	211	215	207	207
T	219	216	207	208
TS	384	405	363	380
Q2-OD	术前（20190729）	术后4周（20190903）	术后8周（20190926）	术后12周（20191029）
G	256	265	252	251
NS	339	361	344	348
N	226	225	222	222
NI	318	319	289	286
TI	212	222	206	204
T	235	248	237	236
TS	253	276	256	252
Q2-OS	术前（20190729）	术后4周（20190903）	术后8周（20190926）	术后12周（20191029）
G	257	267	249	249
NS	401	416	376	373
N	224	229	222	225
NI	305	335	301	292
TI	170	173	159	162
T	239	248	231	235
TS	254	259	248	245
R1-OD	术前（20190814）	术后4周（20190916）	术后8周（20191019）	术后12周（2019111）
G	255	267	268	274
NS	394	428	435	466
N	240	252	250	252
NI	281	293	289	293
TI	198	215	210	211
T	229	234	234	235
TS	228	228	240	249
R1-OS	术前（20190814）	术后4周（20190916）	术后8周（20191019）	术后12周（2019111）
G	246	253	256	258
NS	276	294	316	339
N	257	261	273	275
NI	250	273	257	267
TI	163	171	167	167
T	229	231	232	234
TS	304	304	289	270
R2-OD	术前（20190814）	术后4周（20190911）	术后8周（20191012）	术后12周（20191104）
G	274	267	241	244
NS	378	318	292	292
N	239	245	225	225
NI	257	273	242	245
TI	234	238	221	226
T	236	225	215	217
TS	374	364	294	309
R2-OS	术前（20190814）	术后4周（20190911）	术后8周（20191012）	术后12周（20191104）
G	263	255	242	246
NS	296	278	279	272
N	257	258	246	252
NI	234	235	217	228
TI	230	227	214	218
T	214	203	206	202
TS	404	379	320	341

## Sheet: Figure S1B left panel
			baseline	1wpi	1mpi	2mpi	3mpi			baseline	1wpi	1mpi	2mpi	3mpi
Sham Surgery	Q1	OD	2	2	2	2	2		OS	2	2	2	2	2
	Q2	OD	2	2	2	2	2		OS	2	2	2	2	2
	R1	OD	2		2	2	2		OS	2		2	1	2
	R2	OD	2		2	2	2		OS	2		2	2	2

## Sheet: Figure S1B right panel
			baseline	1wpi	1mpi	2mpi	3mpi			baseline	1wpi	1mpi	2mpi	3mpi
Sham Surgery	Q1	OD	2	2	2	2	2		OS	2	2	2	2	2
	Q2	OD	2	2	2	2	2		OS	2	2	2	2	2
	R1	OD	2		2	1	2		OS	2		2	2	2
	R2	OD	2		2	2	2		OS	2		1	2	2

## Sheet: Figure S1C
goat	category	baseline	1mpi	2mpi
OD 0.1cpd P1 amplitude	Q1	45.6	40.8	39.8
OD 0.3cpd P1 amplitude	Q1	53	40.1	36.3
OD 1.0cpd P1 amplitude	Q1	53.2	37.5	36.2
OD 3.0cpd P1 amplitude	Q1	51.6	37.8	36.7
OS 0.1cpd P1 amplitude	Q1	29.7	36.8	57.6
OS 0.3cpd P1 amplitude	Q1	34	35.8	56.5
OS 1.0cpd P1 amplitude	Q1	31.5	34	54.3
OS 3.0cpd P1 amplitude	Q1	29.5	30.1	51.5
OD 0.1cpd P1 amplitude	Q2	22.4	27.2	27.1
OD 0.3cpd P1 amplitude	Q2	19.7	29.1	25.9
OD 1.0cpd P1 amplitude	Q2	20.9	31	24.7
OD 3.0cpd P1 amplitude	Q2	20.4	26.8	26.2
OS 0.1cpd P1 amplitude	Q2	16	23.6	26
OS 0.3cpd P1 amplitude	Q2	16.1	21.8	27.9
OS 1.0cpd P1 amplitude	Q2	16.6	22.8	27.2
OS 3.0cpd P1 amplitude	Q2	13.5	20.4	27.8
OD 0.1cpd P1 amplitude	R1	10.2	13.4	10.6
OD 0.3cpd P1 amplitude	R1	9.7	12.7	11
OD 1.0cpd P1 amplitude	R1	11.4	11.2	11.9
OD 3.0cpd P1 amplitude	R1	9.3	14.1	22.3
OS 0.1cpd P1 amplitude	R1	13	8.1	7.2
OS 0.3cpd P1 amplitude	R1	12.8	8.6	8.3
OS 1.0cpd P1 amplitude	R1	15.3	9.7	7.5
OS 3.0cpd P1 amplitude	R1	13.8	10.4	16.8
OD 0.1cpd P1 amplitude	R2	20.2	20.5	31.1
OD 0.3cpd P1 amplitude	R2	21.7	23.4	28
OD 1.0cpd P1 amplitude	R2	24.5	23.7	28.5
OD 3.0cpd P1 amplitude	R2	18.2	24.3	25.3
OS 0.1cpd P1 amplitude	R2	16.1	21.6	39.1
OS 0.3cpd P1 amplitude	R2	18	23.6	33.2
OS 1.0cpd P1 amplitude	R2	16.8	22.8	32.4
OS 3.0cpd P1 amplitude	R2	15.1	23.5	29.8

## Sheet: Figure S1D
goat	category	baseline	1mpi	2mpi	3mpi
Q1	OD 0.025 P1 amplitude	11	4.5	6.2	6.3
Q1	OD 0.025 P2 amplitude	20.6	8.3	10.7	8.7
Q1	OD 0.25 P1 amplitude	9.3	5.4	/*	6.4		*We didn't test it
Q1	OD 0.25 P2 amplitude	16.9	8	/*	8.2
Q1	OS 0.025 P1 amplitude	5.9	7	10	7.2
Q1	OS 0.025 P2 amplitude	7.8	10.5	11.2	6.4
Q1	OS 0.25 P1 amplitude	9.3	6.8	/*	5.3
Q1	OS 0.25 P2 amplitude	13.3	9.7	/*	5.3
Q2	OD 0.025 P1 amplitude	9.1	6.6	6.3	6.4
Q2	OD 0.025 P2 amplitude	8.2	5.3	9.3	9.4
Q2	OD 0.25 P1 amplitude	11	6.9	/*	11.5
Q2	OD 0.25 P2 amplitude	11.4	5.8	/*	16
Q2	OS 0.025 P1 amplitude	7	6	8.2	7.5
Q2	OS 0.025 P2 amplitude	12.5	8.2	9.7	7.2
Q2	OS 0.25 P1 amplitude	9.5	8.3	/*	10.4
Q2	OS 0.25 P2 amplitude	12.9	12.8	/*	13.5
R1	OD 0.025 P1 amplitude	6.8	6.2	5.6	4
R1	OD 0.025 P2 amplitude	10	6.9	6.3	3.1
R1	OD 0.25 P1 amplitude	10.1		6.1	4.8
R1	OD 0.25 P2 amplitude	14.2		8.5	4.1
R1	OS 0.025 P1 amplitude	6.8	7.4	5.6	2
R1	OS 0.025 P2 amplitude	10.4	8.8	6.4	1.6
R1	OS 0.25 P1 amplitude	7.5		4.8	2.6
R1	OS 0.25 P2 amplitude	11.7		7.5	3.8
R2	OD 0.025 P1 amplitude	10	12.1	8.8	7.3
R2	OD 0.025 P2 amplitude	10.4	16.1	10.6	8.3
R2	OD 0.25 P1 amplitude	12.2	13.3	9.3	7.6
R2	OD 0.25 P2 amplitude	14.9	18.4	11.5	9
R2	OS 0.025 P1 amplitude	9.1	12.9	6.2	6
R2	OS 0.025 P2 amplitude	11.7	20.3	5.7	10.7
R2	OS 0.25 P1 amplitude	12.4	11.5	9.5	7.7
R2	OS 0.25 P2 amplitude	14.1	12.4	11.7	8.2
