# Supplementary material for: Cold protection allows local cryotherapy in a clinical-relevant model of traumatic optic neuropathy
Source: eLife. 2022 Mar 30;11:e75070. doi: 10.7554/eLife.75070 (PMC9068221; doi:10.7554/eLife.75070)
Supplement: Figure 1—source data 1. [file elife-75070-fig1-data1.xlsx]

## Sheet: Figure 1I
Q1-OD	术前（20190729）	术后4周（20190903）	术后8周（20190926）	术后12周（20191029）			OD-CL
G	263	259	263	254			OS-sham surgery
NS	418	427	412	426
N	221	213	221	214
NI	327	330	346	314
TI	200	201	219	198
T	222	213	216	208
TS	274	264	252	251
Q1-OS	术前（20190729）	术后4周（20190903）	术后8周（20190926）	术后12周（20191029）
G	264	268	252	257
NS	350	367	327	330
N	219	211	209	218
NI	294	299	287	291
TI	211	215	207	207
T	219	216	207	208
TS	384	405	363	380
Q2-OD	术前（20190729）	术后4周（20190903）	术后8周（20190926）	术后12周（20191029）
G	256	265	252	251
NS	339	361	344	348
N	226	225	222	222
NI	318	319	289	286
TI	212	222	206	204
T	235	248	237	236
TS	253	276	256	252
Q2-OS	术前（20190729）	术后4周（20190903）	术后8周（20190926）	术后12周（20191029）
G	257	267	249	249
NS	401	416	376	373
N	224	229	222	225
NI	305	335	301	292
TI	170	173	159	162
T	239	248	231	235
TS	254	259	248	245
R1-OD	术前（20190814）	术后4周（20190916）	术后8周（20191019）	术后12周（2019111）
G	255	267	268	274
NS	394	428	435	466
N	240	252	250	252
NI	281	293	289	293
TI	198	215	210	211
T	229	234	234	235
TS	228	228	240	249
R1-OS	术前（20190814）	术后4周（20190916）	术后8周（20191019）	术后12周（2019111）
G	246	253	256	258
NS	276	294	316	339
N	257	261	273	275
NI	250	273	257	267
TI	163	171	167	167
T	229	231	232	234
TS	304	304	289	270
R2-OD	术前（20190814）	术后4周（20190911）	术后8周（20191012）	术后12周（20191104）
G	274	267	241	244
NS	378	318	292	292
N	239	245	225	225
NI	257	273	242	245
TI	234	238	221	226
T	236	225	215	217
TS	374	364	294	309
R2-OS	术前（20190814）	术后4周（20190911）	术后8周（20191012）	术后12周（20191104）
G	263	255	242	246
NS	296	278	279	272
N	257	258	246	252
NI	234	235	217	228
TI	230	227	214	218
T	214	203	206	202
TS	404	379	320	341

## Sheet: Figure 1J
	1mm2	Inj	S1	S2	S3	I1	I2	I3	T1	T2	T3	N1	N2	N3	mean	CL	S1	S2	S3	I1	I2	I3	T1	T2	T3	N1	N2	N3	mean
Sham	Q1	OS	644.444	455.556	316.667	288.889	366.667	655.556	655.556	3016.67	155.556	1016.67	1311.11	333.333	768.056	OD	1488.89	1777.78	266.667	555.556	466.667	977.778	555.556	977.778	622.222	400	333.333	400	735.185	OS/OD	1.04471
	Q2	OS	700	416.667	227.778	522.222	844.444	1566.67	788.889	1611.11	311.111	466.667	588.889	761.111	733.796	OD	377.778	622.222	844.444	711.111	466.667	622.222	755.556	644.444	488.889	1333.33	822.222	288.889	664.815	OS/OD	1.10376
	R1	OS	450	483.333	677.778	916.667	411.111	444.444	983.333	1250	505.556	900	761.111	972.222	729.63	OD	511.111	600	1450	705.556	594.444	327.778	1755.56	1455.56	572.222	1144.44	583.333	577.778	856.481	OS/OD	0.851892
	R2	OS	477.778	594.444	594.444	755.556	422.222	288.889	1888.89	2472.22	672.222	750	1033.33	1338.89	940.741	OD	361.111	338.889	366.667	838.889	416.667	288.889	566.667	661.111	988.889	1061.11	538.889	411.111	569.907	OS/OD	1.65069

## Sheet: Figure 1K
ON density/1000um2	OD(CL)	OS(Sham)
Q1	/*	118.137
Q2	60.9155	66.7741
R1	103.785	87.7695
R2	68.8496	89.0224
*The quality of TEM section was poor and no data was obtained
