# Supplementary material for: Cold protection allows local cryotherapy in a clinical-relevant model of traumatic optic neuropathy
Source: eLife. 2022 Mar 30;11:e75070. doi: 10.7554/eLife.75070 (PMC9068221; doi:10.7554/eLife.75070)
Supplement: Figure 2—figure supplement 1—source data 1. [file elife-75070-fig2-figsupp1-data1.xlsx]

## Sheet: Figure S2A left panel
			baseline	1wpi	1mpi	2mpi	3mpi			baseline	1wpi	1mpi	2mpi	3mpi
goat TON	V1	OD	2	2	2	2	2		OS	2	0	0	0	0
	V2	OD	2	2	2	2	2		OS	2	0	0	0	0
	V3	OD	2	2	2	2	2		OS	2	0	0	0	0
	V4	OD	2	1	2	2	2		OS	2	0	0	0	0
	V5	OD	2	2	2	2	2		OS	2	0	0	0	0

## Sheet: Figure S2A middle panel
			baseline	1wpi	1mpi	2mpi	3mpi			baseline	1wpi	1mpi	2mpi	3mpi
goat TON	V1	OD	1	0	0	0	0		OS	2	2	2	2	2
	V2	OD	2	0	0	0	0		OS	2	2	2	2	2
	V3	OD	2	0	0	0	0		OS	2	2	2	2	2
	V4	OD	2	0	0	0	0		OS	2	1	2	2	2
	V5	OD	2	0	0	0	0		OS	2	1	2	2	2

## Sheet: Figure S2A right panel
V1-OD	术前（20191012）	术后1周（20191022）	术后4周（20191115）	术后8周（20191209）	术后12周（20200107）			OD-CL
G	246	226	229	237	219			OS-Inj
NS	284	260	255	268	247
N	259	234	242	243	225
NI	224	211	215	223	206
TI	206	188	191	207	189
T	208	193	191	198	186
TS	317	296	301	320	288
V1-OS	术前（20191012）	术后1周（20191022）	术后4周（20191115）	术后8周（20191209）	术后12周（20200107）
G	254	230	213	198	170
NS	317	276	246	238	192
N	255	238	222	192	170
NI	189	183	175	172	146
TI	232	194	185	172	158
T	211	180	169	157	140
TS	359	346	314	303	245
V2-OD	术前（20191012）	术后1周（20191024）	术后4周（20191115）	术后8周（20191209）	术后12周（20200106）
G	235	234	235	249	244
NS	232	228	234	228	243
N	239	232	236	244	238
NI	248	254	260	288	265
TI	205	205	213	208	211
T	193	192	198	196	197
TS	328	335	303	388	363
V2-OS	术前（20191012）	术后1周（20191024）	术后4周（20191115）	术后8周（20191209）	术后12周（20200106）
G	229	223	206	202	188
NS	253	250	231	213	199
N	223	217	197	188	185
NI	233	230	220	217	202
TI	193	191	179	178	174
T	212	201	186	192	165
TS	285	277	252	247	232
V3-OD	术前（20191012）	术后1周（20191022）	术后4周（20191115）	术后8周（20191209）	术后12周（20200106）
G	226	230	238	238	238
NS	218	229	232	225	227
N	199	204	206	209	201
NI	221	232	253	239	247
TI	219	214	234	236	230
T	216	210	215	220	221
TS	317	336	343	342	361
V3-OS	术前（20191012）	术后1周（20191022）	术后4周（20191115）	术后8周（20191209）	术后12周（20200106）
G	225	225	214	180	157
NS	183	180	175	157	135
N	202	211	199	166	151
NI	183	199	200	154	145
TI	255	250	232	196	164
T	240	227	210	180	149
TS	292	298	290	242	211
V4-OD	术前（20191010）	术后1周（20191023）	术后4周（20191111）	术后8周（20191209）	术后12周（20200107）
G	229	236	238	241	224
NS	309	322	336	333	292
N	213	220	221	221	210
NI	253	258	267	275	257
TI	174	184	185	193	180
T	203	205	203	206	200
TS	263	274	267	269	246
V4-OS	术前（20191010）	术后1周（20191023）	术后4周（20191111）	术后8周（20191209）	术后12周（20200107）
G	229	234	215	198	169
NS	270	292	264	248	207
N	220	218	209	190	160
NI	220	235	210	202	169
TI	184	188	182	165	135
T	226	222	201	184	160
TS	270	277	241	224	200
V5-OD	术前（20191010）	术后1周（20191023）	术后4周（20191111）	术后8周（20191211）	术后12周（20200107）
G	228	231	242	245	241
NS	269	306	349	344	313
N	233	240	246	244	243
NI	244	241	229	258	258
TI	213	201	212	218	235
T	188	187	197	193	190
TS	253	242	263	262	260
V5-OS	术前（20191010）	术后1周（20191023）	术后4周（20191111）	术后8周（20191211）	术后12周（20200107）
G	230	228	213	206	177
NS	283	278	257	250	223
N	268	267	236	217	184
NI	185	181	172	168	151
TI	210	205	193	198	175
T	186	187	181	177	151
TS	255	252	243	243	199

## Sheet: Figure S2B left panel
	1mm2	Inj	S1	S2	S3	I1	I2	I3	T1	T2	T3	N1	N2	N3	mean	CL	S1	S2	S3	I1	I2	I3	T1	T2	T3	N1	N2	N3	mean
goat TON	V1	OS	33.3333	127.778	188.889	44.4444	61.1111	50	38.8889	155.556	88.8889	44.4444	50	116.667	83.3333	OD	377.778	450	333.333	1111.11	616.667	211.111	544.444	938.889	327.778	1122.22	772.222	466.667	606.019	OS/OD	0.13751
	V2	OS	188.889	327.778	200	133.333	133.333	55.5556	250	261.111	166.667	327.778	211.111	333.333	215.741	OD	383.333	322.222	261.111	688.889	527.778	344.444	661.111	994.444	438.889	472.222	916.667	872.222	573.611	OS/OD	0.37611
	V3	OS	155.556	172.222	166.667	200	150	72.2222	172.222	344.444	183.333	133.333	238.889	427.778	201.389	OD	422.222	372.222	261.111	550	350	233.333	611.111	1011.11	477.778	783.333	1105.56	1138.89	609.722	OS/OD	0.330296
	V4	OS	44.4444	94.4444	155.556	22.2222	83.3333	61.1111	155.556	100	55.5556	27.7778	38.8889	327.778	97.2222	OD	394.444	366.667	411.111	588.889	427.778	244.444	850	1122.22	255.556	644.444	900	1127.78	611.111	OS/OD	0.159091
	V5	OS	61.1111	83.3333	122.222	244.444	183.333	72.2222	94.4444	400	150	83.3333	94.4444	94.4444	140.278	OD	238.889	344.444	272.222	788.889	400	266.667	611.111	988.889	72.2222	722.222	1272.22	661.111	553.241	OS/OD	0.253556

## Sheet: Figure S2B right panel
	OD-3(CL)	OS-1	OS-2	OS-3	OS-4		0S-1/OD-3	OS-2/OD-3	OS-3/OD-3	OS-4/OD-3
V1	173.625	22.5362	21.9855	5.19631	0.508335		0.129798	0.126627	0.0299284	0.00292778
V2	147.219	44.8019	65.7731	68.1641	0		0.30432	0.446769	0.46301	0
V3	108.004	40.2291	19.7545	0.127084	4.68798		0.372477	0.182905	0.00117666	0.0434055
V4	111.848	19.3924	70.566	0.141204	0.118612		0.173382	0.630911	0.00126247	0.00106047
V5	104.751	48.2541	41.5974	0.0282408	0		0.460655	0.397108	0.0002696	0

## Sheet: Figure S2C
14-OD(20190918)	术前（20190821）	术后4W（20191016）	术后8W(20191113)	术后12W(20191211)
G	148	149	147	149
NS	168	168	154	169
N	99	103	98	101
NI	136	135	133	135
TI	227	229	227	226
T	130	130	134	131
TS	192	192	197	193
14-OS	术前（20190821）	术后4W（20191016）	术后8W(20191113)	术后12W(20191211)
G	147	88	68	65
NS	134	85	64	63
N	94	69	57	53
NI	188	120	84	77
TI	205	106	77	78
T	129	70	57	55
TS	199	119	91	88
18-OD(20190927)	术前（20190821）	2次术前（20190907）	2次术前（20190914）	术后4W（20191025）	术后8W(20191123)	术后12W(20191220
G	146	145	143	142	147	148
NS	145	151	143	141	156	150
N	99	100	100	99	99	104
NI	169	167	163	163	175	172
TI	205	194	196	193	193	198
T	137	131	134	134	135	135
TS	180	185	177	178	187	185
18-OS	术前（20190821）	2次术前（20190907）	2次术前（20190914）	术后4W（20191025）	术后8W(20191123)	术后12W(20191220
G	145	131	121	69	65	62
NS	145	131	120	70	70	63
N	103	91	83	56	55	50
NI	140	129	118	72	65	65
TI	191	177	162	89	90	82
T	138	126	117	61	55	53
TS	200	174	164	82	78	80
39-OD（20190921）	术前（20190914）	术后4W（20191018）	术后8W(20191115)	术后12W(20191212)
G	154	154	158	153
NS	167	169	173	167
N	108	104	113	106
NI	170	170	183	172
TI	210	215	214	211
T	132	133	134	130
TS	204	204	204	203
39-OS	术前（20190914）	术后4W（20191018）	术后8W(20191115)	术后12W(20191212)
G	150	102	72	67
NS	138	98	66	58
N	113	78	57	54
NI	201	140	97	86
TI	183	109	72	72
T	130	85	65	61
TS	189	141	96	87
65-OD（20190926）	术前（20190925）	术后4W（20191025）	术后8W(20191123)	术后12W(20191220)
G	147	143	143	149
NS	166	160	161	169
N	102	98	102	108
NI	178	169	170	174
TI	198	197	195	197
T	121	122	119	124
TS	186	182	180	184
65-OS	术前（20190925）	术后4W（20191025）	术后8W(20191123)	术后12W(20191220)
G	148	93	70	67
NS	175	110	90	81
N	110	75	60	55
NI	207	133	100	89
TI	182	108	64	69
T	114	70	60	59
TS	173	100	70	67
