# Supplementary material for: Cold protection allows local cryotherapy in a clinical-relevant model of traumatic optic neuropathy
Source: eLife. 2022 Mar 30;11:e75070. doi: 10.7554/eLife.75070 (PMC9068221; doi:10.7554/eLife.75070)
Supplement: Figure 2—source data 1. [file elife-75070-fig2-data1.xlsx]

## Sheet: Figure 2C left panel
			baseline	1wpi	1mpi	2mpi	3mpi			baseline	1wpi	1mpi	2mpi	3mpi
goat TON	V1	OD	2	2	2	2	2		OS	2	0	0	0	0
	V2	OD	2	2	2	2	2		OS	2	0	0	0	0
	V3	OD	2	2	2	2	2		OS	2	0	0	0	0
	V4	OD	2	1	2	2	2		OS	2	0	0	0	0
	V5	OD	2	2	2	2	2		OS	2	0	0	0	0

## Sheet: Figure 2C right panel
			baseline	1wpi	1mpi	2mpi	3mpi			baseline	1wpi	1mpi	2mpi	3mpi
goat TON	V1	OD	1	0	0	0	0		OS	2	2	2	2	2
	V2	OD	2	0	0	0	0		OS	2	2	2	2	2
	V3	OD	2	0	0	0	0		OS	2	2	2	2	2
	V4	OD	2	0	0	0	0		OS	2	1	2	2	2
	V5	OD	2	0	0	0	0		OS	2	1	2	2	2

## Sheet: Figure 2D
goat	category	baseline	1wpi	1mpi	2mpi	3mpi
V1	OD 0.025 P1 amplitude	8.5	6.2	6.9	5.2	2.1
V1	OD 0.025 P2 amplitude	9.7	7.7	9.7	5.4	1.5
V1	OD 0.25 P1 amplitude	13.3	8.2	10	8.8	7
V1	OD 0.25 P2 amplitude	13.8	12.2	13.3	12.6	7
V1	OS 0.025 P1 amplitude	12.2	0.5	1	1.3	0.4
V1	OS 0.025 P2 amplitude	15.1	1.9	2	0.7	0.5
V1	OS 0.25 P1 amplitude	12.8	0.7	2.3	2.4	2.3
V1	OS 0.25 P2 amplitude	17.7	1.9	2.3	2.5	1.7
V2	OD 0.025 P1 amplitude	9.9	9.3	9.7	5.3	4.4
V2	OD 0.025 P2 amplitude	11	9.6	9.6	7.6	5
V2	OD 0.25 P1 amplitude	14.6	9.4	18	6.8	6.1
V2	OD 0.25 P2 amplitude	13	12.6	23.5	9.9	8.6
V2	OS 0.025 P1 amplitude	11.3	4.1	4.6	2	1.1
V2	OS 0.025 P2 amplitude	15.6	4.1	4.5	2.2	0.8
V2	OS 0.25 P1 amplitude	11.1	8.6	9	3.8	1.2
V2	OS 0.25 P2 amplitude	14.9	8.22	8.1	3.1	2
V3	OD 0.025 P1 amplitude	5.6	4.8	6.8	4.3	3.9
V3	OD 0.025 P2 amplitude	7.9	7.5	8.9	5.6	4.8
V3	OD 0.25 P1 amplitude	7.8	7.2	8.8	6.9	6.3
V3	OD 0.25 P2 amplitude	10.7	12.1	14.5	10.3	10.9
V3	OS 0.025 P1 amplitude	7.2	0.6	1.6	1.1	0.8
V3	OS 0.025 P2 amplitude	11.3	1.8	0.8	1	0.5
V3	OS 0.25 P1 amplitude	7.7	1	2.4	1.8	1.7
V3	OS 0.25 P2 amplitude	10.9	1.6	2.1	3	2.4
V4	OD 0.025 P1 amplitude	10	3.4	5.5	6.6	3.7
V4	OD 0.025 P2 amplitude	13.1	4.1	5.3	6.1	4.8
V4	OD 0.25 P1 amplitude	10.3	1	10.3	7.4	6.8
V4	OD 0.25 P2 amplitude	13.9	6.3	12.1	9	9.7
V4	OS 0.025 P1 amplitude	8.3	0.9	6.4	4.2	3.8
V4	OS 0.025 P2 amplitude	10.1	3.1	9.3	3.7	2.7
V4	OS 0.25 P1 amplitude	10.1	1.3	6.9	7.8	5.8
V4	OS 0.25 P2 amplitude	11.6	2.4	9.7	6.9	7.1
V5	OD 0.025 P1 amplitude	9.9	8.1	10.2	8.6	8.4
V5	OD 0.025 P2 amplitude	14.3	12.7	11.5	9.6	7.5
V5	OD 0.25 P1 amplitude	11.9	10	11.7	8.5	4.9
V5	OD 0.25 P2 amplitude	14.1	13.4	14	10.4	12.1
V5	OS 0.025 P1 amplitude	13.4	4.2	5.8	3.8	2.8
V5	OS 0.025 P2 amplitude	15.9	6.3	7.8	6.3	3.5
V5	OS 0.25 P1 amplitude	10.7	4.1	9.2	7.6	2.5
V5	OS 0.25 P2 amplitude	13	4.9	9.2	11	2.6

## Sheet: Figure 2E
goat	category	baseline	1wpi	1mpi	2mpi	3mpi
OD 0.1cpd P1 amplitude	V1	28.7	16.8	14.4	11	21.4
OD 0.3cpd P1 amplitude	V1	29.7	16.4	18.4	11.9	18.9
OD 1.0cpd P1 amplitude	V1	31.3	16.1	13.2	11.2	14.8
OD 3.0cpd P1 amplitude	V1	29.6	17.2	14.8	10.7	21.1
OS 0.1cpd P1 amplitude	V1	32.3	13.1	4.3	7	7.5
OS 0.3cpd P1 amplitude	V1	32.2	13.5	8.4	7.4	4.1
OS 1.0cpd P1 amplitude	V1	31.8	12.8	8	7.1	3
OS 3.0cpd P1 amplitude	V1	31.9	11	9.3	6.7	4.9
OD 0.1cpd P1 amplitude	V2	31.4	16.1	32.7	16.1	28
OD 0.3cpd P1 amplitude	V2	32	15.9	32.1	18.6	28.5
OD 1.0cpd P1 amplitude	V2	29.3	15.4	31.9	21.3	27.8
OD 3.0cpd P1 amplitude	V2	28.8	22.2	32.2	20.8	27.1
OS 0.1cpd P1 amplitude	V2	27.5	14.8	14.1	13.6	19.5
OS 0.3cpd P1 amplitude	V2	28.5	15	14.8	15	18.4
OS 1.0cpd P1 amplitude	V2	29.1	14.9	14.3	13.9	16.1
OS 3.0cpd P1 amplitude	V2	29.6	20.3	15.7	13	20.5
OD 0.1cpd P1 amplitude	V3	19.2	7.4	20.1	10.6	13.2
OD 0.3cpd P1 amplitude	V3	18.5	9	17.6	10.6	12.8
OD 1.0cpd P1 amplitude	V3	18.6	8.4	18.7	11.3	12.9
OD 3.0cpd P1 amplitude	V3	21.7	19.8	23.1	11.8	15.2
OS 0.1cpd P1 amplitude	V3	15.1	7.9	10.1	8	7.8
OS 0.3cpd P1 amplitude	V3	14.6	9.2	9.3	7.7	8.3
OS 1.0cpd P1 amplitude	V3	18.9	9.3	8.8	8.4	9.6
OS 3.0cpd P1 amplitude	V3	19.7	16.2	13.9	7.2	12
OD 0.1cpd P1 amplitude	V4	25.7	15.6	15.7	17.3	14.1
OD 0.3cpd P1 amplitude	V4	26.5	16.2	15.8	17.9	12.3
OD 1.0cpd P1 amplitude	V4	26	16.3	15.7	17.2	14.1
OD 3.0cpd P1 amplitude	V4	30.3	20.9	13.8	18.1	13
OS 0.1cpd P1 amplitude	V4	22.1	15.3	16.2	7.3	7.3
OS 0.3cpd P1 amplitude	V4	21.1	15.1	14.8	7.6	7.4
OS 1.0cpd P1 amplitude	V4	20.6	15.6	14.9	7.8	7.1
OS 3.0cpd P1 amplitude	V4	20.3	16.9	12.7	8.9	8.5
OD 0.1cpd P1 amplitude	V5	21	18.8	28.6	22	18.3
OD 0.3cpd P1 amplitude	V5	21.3	18	29.2	22.6	20.4
OD 1.0cpd P1 amplitude	V5	21.1	18.2	28.4	24.1	22.9
OD 3.0cpd P1 amplitude	V5	26.7	23.1	26.7	23.2	22.4
OS 0.1cpd P1 amplitude	V5	14.8	19.3	15.1	16.2	10.7
OS 0.3cpd P1 amplitude	V5	13.8	17.7	14.8	14.8	11.1
OS 1.0cpd P1 amplitude	V5	12.8	17.2	14.3	16	13.5
OS 3.0cpd P1 amplitude	V5	15.7	22.8	13.4	15.5	12.7
