# Supplementary material for: Cold protection allows local cryotherapy in a clinical-relevant model of traumatic optic neuropathy
Source: eLife. 2022 Mar 30;11:e75070. doi: 10.7554/eLife.75070 (PMC9068221; doi:10.7554/eLife.75070)
Supplement: Figure 3—source data 1. [file elife-75070-fig3-data1.xlsx]

## Sheet: Figure 3A
V1-OD	术前（20191012）	术后1周（20191022）	术后4周（20191115）	术后8周（20191209）	术后12周（20200107）			OD-CL
G	246	226	229	237	219			OS-Inj
NS	284	260	255	268	247
N	259	234	242	243	225
NI	224	211	215	223	206
TI	206	188	191	207	189
T	208	193	191	198	186
TS	317	296	301	320	288
V1-OS	术前（20191012）	术后1周（20191022）	术后4周（20191115）	术后8周（20191209）	术后12周（20200107）
G	254	230	213	198	170
NS	317	276	246	238	192
N	255	238	222	192	170
NI	189	183	175	172	146
TI	232	194	185	172	158
T	211	180	169	157	140
TS	359	346	314	303	245
V2-OD	术前（20191012）	术后1周（20191024）	术后4周（20191115）	术后8周（20191209）	术后12周（20200106）
G	235	234	235	249	244
NS	232	228	234	228	243
N	239	232	236	244	238
NI	248	254	260	288	265
TI	205	205	213	208	211
T	193	192	198	196	197
TS	328	335	303	388	363
V2-OS	术前（20191012）	术后1周（20191024）	术后4周（20191115）	术后8周（20191209）	术后12周（20200106）
G	229	223	206	202	188
NS	253	250	231	213	199
N	223	217	197	188	185
NI	233	230	220	217	202
TI	193	191	179	178	174
T	212	201	186	192	165
TS	285	277	252	247	232
V3-OD	术前（20191012）	术后1周（20191022）	术后4周（20191115）	术后8周（20191209）	术后12周（20200106）
G	226	230	238	238	238
NS	218	229	232	225	227
N	199	204	206	209	201
NI	221	232	253	239	247
TI	219	214	234	236	230
T	216	210	215	220	221
TS	317	336	343	342	361
V3-OS	术前（20191012）	术后1周（20191022）	术后4周（20191115）	术后8周（20191209）	术后12周（20200106）
G	225	225	214	180	157
NS	183	180	175	157	135
N	202	211	199	166	151
NI	183	199	200	154	145
TI	255	250	232	196	164
T	240	227	210	180	149
TS	292	298	290	242	211
V4-OD	术前（20191010）	术后1周（20191023）	术后4周（20191111）	术后8周（20191209）	术后12周（20200107）
G	229	236	238	241	224
NS	309	322	336	333	292
N	213	220	221	221	210
NI	253	258	267	275	257
TI	174	184	185	193	180
T	203	205	203	206	200
TS	263	274	267	269	246
V4-OS	术前（20191010）	术后1周（20191023）	术后4周（20191111）	术后8周（20191209）	术后12周（20200107）
G	229	234	215	198	169
NS	270	292	264	248	207
N	220	218	209	190	160
NI	220	235	210	202	169
TI	184	188	182	165	135
T	226	222	201	184	160
TS	270	277	241	224	200
V5-OD	术前（20191010）	术后1周（20191023）	术后4周（20191111）	术后8周（20191211）	术后12周（20200107）
G	228	231	242	245	241
NS	269	306	349	344	313
N	233	240	246	244	243
NI	244	241	229	258	258
TI	213	201	212	218	235
T	188	187	197	193	190
TS	253	242	263	262	260
V5-OS	术前（20191010）	术后1周（20191023）	术后4周（20191111）	术后8周（20191211）	术后12周（20200107）
G	230	228	213	206	177
NS	283	278	257	250	223
N	268	267	236	217	184
NI	185	181	172	168	151
TI	210	205	193	198	175
T	186	187	181	177	151
TS	255	252	243	243	199

## Sheet: Figure 3B
	1mm2	Inj	S1	S2	S3	I1	I2	I3	T1	T2	T3	N1	N2	N3	mean	CL	S1	S2	S3	I1	I2	I3	T1	T2	T3	N1	N2	N3	mean
goat TON	V1	OS	33.3333	127.778	188.889	44.4444	61.1111	50	38.8889	155.556	88.8889	44.4444	50	116.667	83.3333	OD	377.778	450	333.333	1111.11	616.667	211.111	544.444	938.889	327.778	1122.22	772.222	466.667	606.019	OS/OD	0.13751
	V2	OS	188.889	327.778	200	133.333	133.333	55.5556	250	261.111	166.667	327.778	211.111	333.333	215.741	OD	383.333	322.222	261.111	688.889	527.778	344.444	661.111	994.444	438.889	472.222	916.667	872.222	573.611	OS/OD	0.37611
	V3	OS	155.556	172.222	166.667	200	150	72.2222	172.222	344.444	183.333	133.333	238.889	427.778	201.389	OD	422.222	372.222	261.111	550	350	233.333	611.111	1011.11	477.778	783.333	1105.56	1138.89	609.722	OS/OD	0.330296
	V4	OS	44.4444	94.4444	155.556	22.2222	83.3333	61.1111	155.556	100	55.5556	27.7778	38.8889	327.778	97.2222	OD	394.444	366.667	411.111	588.889	427.778	244.444	850	1122.22	255.556	644.444	900	1127.78	611.111	OS/OD	0.159091
	V5	OS	61.1111	83.3333	122.222	244.444	183.333	72.2222	94.4444	400	150	83.3333	94.4444	94.4444	140.278	OD	238.889	344.444	272.222	788.889	400	266.667	611.111	988.889	72.2222	722.222	1272.22	661.111	553.241	OS/OD	0.253556

## Sheet: Figure 3D-G
	OD-3(CL)	OS-1	OS-2	OS-3	OS-4		0S-1/OD-3	OS-2/OD-3	OS-3/OD-3	OS-4/OD-3
V1	173.625	22.5362	21.9855	5.19631	0.508335		0.129798	0.126627	0.0299284	0.00292778
V2	147.219	44.8019	65.7731	68.1641	0		0.30432	0.446769	0.46301	0
V3	108.004	40.2291	19.7545	0.127084	4.68798		0.372477	0.182905	0.00117666	0.0434055
V4	111.848	19.3924	70.566	0.141204	0.118612		0.173382	0.630911	0.00126247	0.00106047
V5	104.751	48.2541	41.5974	0.0282408	0		0.460655	0.397108	0.0002696	0
