# Supplementary material for: Cold protection allows local cryotherapy in a clinical-relevant model of traumatic optic neuropathy
Source: eLife. 2022 Mar 30;11:e75070. doi: 10.7554/eLife.75070 (PMC9068221; doi:10.7554/eLife.75070)
Supplement: Figure 5—figure supplement 1—source data 1. [file elife-75070-fig5-figsupp1-data1.xlsx]

## Sheet: Figure S5A left panel
			baseline	1wpi	1mpi	2mpi	3mpi			baseline	1wpi	1mpi	2mpi	3mpi
no treatment group	666								OS	2		0
	763								OS	2		0
	756								OS	2		0
hypothermia+PI group	662								OS	2		0
	663								OS	2		0
	773								OS	2		0
	735								OS	2		0
	769								OS	2		0
hypothermia group	776								OS	2		0
	806								OS	2		0
	805								OS	2		0
	804								OS	2		0
	802								OS	2		0
PI group	PI-1								OS	2		0
	PI-2								OS	2		0
	PI-3								OS	2		0
	PI-4								OS	2		0
	PI-5								OS	2		0

## Sheet: Figure S5A right panel
			baseline	1wpi	1mpi	2mpi	3mpi			baseline	1wpi	1mpi	2mpi	3mpi
no treatment group	666	OD	2		1
	763	OD	2		0
	756	OD	2		0
hypothermia+PI group	662	OD	2		0
	663	OD	2		0
	773	OD	2		0
	735	OD	2		0
	769	OD	2		0
hypothermia group	776	OD	2		0
	806	OD	2		0
	805	OD	2		0
	804	OD	2		0
	802	OD	2		0
PI group	PI-1	OD	2		0
	PI-2	OD	2		0
	PI-3	OD	2		0
	PI-4	OD	2		0
	PI-5	OD	2		0

## Sheet: Figure S5C-hypothermia+PI
goat	category	4wpi
662	OD 0.025 P1 amplitude	5
662	OD 0.025 P2 amplitude	5
662	OD 0.25 P1 amplitude	8.4
662	OD 0.25 P2 amplitude	7.3
662	OS 0.025 P1 amplitude	2.4
662	OS 0.025 P2 amplitude	2.5
662	OS 0.25 P1 amplitude	2.5
662	OS 0.25 P2 amplitude	3
663	OD 0.025 P1 amplitude	11.5
663	OD 0.025 P2 amplitude	14.3
663	OD 0.25 P1 amplitude	7.1
663	OD 0.25 P2 amplitude	11.5
663	OS 0.025 P1 amplitude	18.2
663	OS 0.025 P2 amplitude	15.8
663	OS 0.25 P1 amplitude	15.3
663	OS 0.25 P2 amplitude	8.9
735	OD 0.025 P1 amplitude	4.3
735	OD 0.025 P2 amplitude	2.7
735	OD 0.25 P1 amplitude	6.4
735	OD 0.25 P2 amplitude	9.2
735	OS 0.025 P1 amplitude	3.5
735	OS 0.025 P2 amplitude	6.3
735	OS 0.25 P1 amplitude	2.6
735	OS 0.25 P2 amplitude	6.1
769	OD 0.025 P1 amplitude	4.4
769	OD 0.025 P2 amplitude	2.6
769	OD 0.25 P1 amplitude	12.6
769	OD 0.25 P2 amplitude	12.1
769	OS 0.025 P1 amplitude	1.3
769	OS 0.025 P2 amplitude	2.9
769	OS 0.25 P1 amplitude	4.4
769	OS 0.25 P2 amplitude	3.4
773	OD 0.025 P1 amplitude	9.1
773	OD 0.025 P2 amplitude	8.4
773	OD 0.25 P1 amplitude	9.3
773	OD 0.25 P2 amplitude	9.6
773	OS 0.025 P1 amplitude	3.1
773	OS 0.025 P2 amplitude	2.7
773	OS 0.25 P1 amplitude	5.7
773	OS 0.25 P2 amplitude	4.3

## Sheet: Figure S5C-hypothermia
1mpi		802	776	804	805	806
0.025P1amp	OD	7.7	9.4	9.1	6.2	8.6
0.025P2amp	OD	7.7	8.1	16.2	9.3	16.3
0.25P1amp	OD	9.1	15.5	11.9	5	11.6
0.25P2amp	OD	10.9	12.2	11.6	7.4	12.9
0.025P1amp	OS	6.6	6.7	5.8	5.4	10
0.025P2amp	OS	7.3	5.6	6.1	6.3	13.8
0.25P1amp	OS	8.2	5.9	3.3	7.9	5.9
0.25P2amp	OS	8.9	5.2	2.6	3.9	8.7

## Sheet: Figure S5C-PI
1mpi		PI-1	PI-2	PI-3	PI-4	PI-5
0.025P1amp	OD	4.7	6.5	3.7	11.2	5.4
0.025P2amp	OD	14	4	8.7	7.5	5.6
0.25P1amp	OD	11.9	10.4	5.7	16.5	5.1
0.25P2amp	OD	21.5	10.2	10.8	13.2	13.2
0.025P1amp	OS	2.9	4.8	5.2	1.8	5
0.025P2amp	OS	3.9	4.1	2.9	5.9	1.7
0.25P1amp	OS	7.5	4.5	4.3	2.7	3.8
0.25P2amp	OS	11.1	8.4	2.2	6.4	3.9

## Sheet: Figure S5C-no treatment
goat	category	4wpi
666	OD 0.025 P1 amplitude	4.3
666	OD 0.025 P2 amplitude	6.5
666	OD 0.25 P1 amplitude	6.1
666	OD 0.25 P2 amplitude	12.6
666	OS 0.025 P1 amplitude	3
666	OS 0.025 P2 amplitude	3.3
666	OS 0.25 P1 amplitude	3.7
666	OS 0.25 P2 amplitude	3.1
756	OD 0.025 P1 amplitude	9
756	OD 0.025 P2 amplitude	7.4
756	OD 0.25 P1 amplitude	12.2
756	OD 0.25 P2 amplitude	16.3
756	OS 0.025 P1 amplitude	5.9
756	OS 0.025 P2 amplitude	7.9
756	OS 0.25 P1 amplitude	7.6
756	OS 0.25 P2 amplitude	8.3
763	OD 0.025 P1 amplitude	7
763	OD 0.025 P2 amplitude	4.9
763	OD 0.25 P1 amplitude	11
763	OD 0.25 P2 amplitude	12.3
763	OS 0.025 P1 amplitude	6.7
763	OS 0.025 P2 amplitude	5.8
763	OS 0.25 P1 amplitude	9.8
763	OS 0.25 P2 amplitude	8.1
X1	OD 0.025 P1 amplitude	6.3
X1	OD 0.025 P2 amplitude	7.2
X1	OD 0.25 P1 amplitude	12.8
X1	OD 0.25 P2 amplitude	12.7
X1	OS 0.025 P1 amplitude	1.5
X1	OS 0.025 P2 amplitude	4.2
X1	OS 0.25 P1 amplitude	2.8
X1	OS 0.25 P2 amplitude	2.5
X2	OD 0.025 P1 amplitude	8
X2	OD 0.025 P2 amplitude	8.8
X2	OD 0.25 P1 amplitude	13.1
X2	OD 0.25 P2 amplitude	18.1
X2	OS 0.025 P1 amplitude	4.2
X2	OS 0.025 P2 amplitude	5.2
X2	OS 0.25 P1 amplitude	6.9
X2	OS 0.25 P2 amplitude	5.8
X6	OD 0.025 P1 amplitude	5.9
X6	OD 0.025 P2 amplitude	10.8
X6	OD 0.25 P1 amplitude	9.1
X6	OD 0.25 P2 amplitude	10.9
X6	OS 0.025 P1 amplitude	3.8
X6	OS 0.025 P2 amplitude	2.9
X6	OS 0.25 P1 amplitude	8
X6	OS 0.25 P2 amplitude	8.7

## Sheet: Figure S5D
	ON density/1000um2	OD-3(CL)	OS-3(Inj)	OS-4(Inj)
no treatment	X1	103.249	0.11552	0.409492
	X2	101.938	0.155325	6.3189
	X6	149.065	0.0296772	0.127084
	666	82.9264	0.169445	0.271112
	763	123.949	0.118612	6.67613
hypothermia+PI	663	92.5509	38.769	3.10084
	662	93.2795	3.45668	1.08445
	773	117.12	7.59114	4.91391
	735	95.4823	9.99726	6.81169
	769	112.223	28.9582	8.06558
