# Supplementary material for: Cold protection allows local cryotherapy in a clinical-relevant model of traumatic optic neuropathy
Source: eLife. 2022 Mar 30;11:e75070. doi: 10.7554/eLife.75070 (PMC9068221; doi:10.7554/eLife.75070)
Supplement: Figure 5—source data 1. [file elife-75070-fig5-data1.xlsx]

## Sheet: Figure 5C
	37 °C	0 °C	0 °C+PI
1	997.382	166.23	959.05
2	831.772	41.1854	683.281
3	1632.04	506.01	830.408
4	1826.3	947.389	758.829
5	3852.39	634.281	1450.79
6	2826.79	479.587	1580.43
7	723.226	859.064	812.544
8	2075.52	371.785	975.549
9	2080.86	784.384	1665.53
10	1551.28	440.014	792.696
11	3579.29	394.363	601.159

## Sheet: Figure 5D
	37 °C	0 °C	0 °C+PI
1	0.262734	4.24695	2.08166
2	1.37726	2.95127	2.33434
3	0.302353	3.95464	2.18934
4	0.299478	4.54198	2.89787
5	0.557899	2.6483	3.42968
6	0.277936	4.6179	3.41981
7	0.270685	4.35457	4.25708
8	0.478365	5.64364	2.95389
9	0.461624	3.73375	3.13542
10	0.124526	5.7002	3.93641
11	0.0400879	8.45609	0.93811

## Sheet: Figure 5H-hypothermia+PI
goat	category	4wpi
OD 0.1cpd P1 amplitude	662	12
OD 0.3cpd P1 amplitude	662	11.2
OD 1.0cpd P1 amplitude	662	10
OD 3.0cpd P1 amplitude	662	41.1
OS 0.1cpd P1 amplitude	662	10.4
OS 0.3cpd P1 amplitude	662	10
OS 1.0cpd P1 amplitude	662	9.7
OS 3.0cpd P1 amplitude	662	34.2
OD 0.1cpd P1 amplitude	663	16.4
OD 0.3cpd P1 amplitude	663	25.2
OD 1.0cpd P1 amplitude	663	24.5
OD 3.0cpd P1 amplitude	663	38.8
OS 0.1cpd P1 amplitude	663	20.7
OS 0.3cpd P1 amplitude	663	22.5
OS 1.0cpd P1 amplitude	663	21.3
OS 3.0cpd P1 amplitude	663	29.8
OD 0.1cpd P1 amplitude	735	9.6
OD 0.3cpd P1 amplitude	735	11.7
OD 1.0cpd P1 amplitude	735	11.3
OD 3.0cpd P1 amplitude	735	19.8
OS 0.1cpd P1 amplitude	735	7.7
OS 0.3cpd P1 amplitude	735	8.7
OS 1.0cpd P1 amplitude	735	8.7
OS 3.0cpd P1 amplitude	735	14.1
OD 0.1cpd P1 amplitude	769	18.9
OD 0.3cpd P1 amplitude	769	19.2
OD 1.0cpd P1 amplitude	769	17.9
OD 3.0cpd P1 amplitude	769	21.1
OS 0.1cpd P1 amplitude	769	10.9
OS 0.3cpd P1 amplitude	769	10.5
OS 1.0cpd P1 amplitude	769	9.4
OS 3.0cpd P1 amplitude	769	11.7
OD 0.1cpd P1 amplitude	773	14.6
OD 0.3cpd P1 amplitude	773	14.1
OD 1.0cpd P1 amplitude	773	13.3
OD 3.0cpd P1 amplitude	773	20.7
OS 0.1cpd P1 amplitude	773	15.2
OS 0.3cpd P1 amplitude	773	13.5
OS 1.0cpd P1 amplitude	773	11.9
OS 3.0cpd P1 amplitude	773	15.1

## Sheet: Figure 5H-hypothermia
1wpi		802	776	804	805	806
0.1 P1 amp	OD	23.7	33	35.8	21.3	18
0.3 P1 amp	OD	24.8	36.6	35.2	22.2	14.2
1.0 P1 amp	OD	24.5	35.1	35.7	23.3	15.7
3.0 P1 amp	OD	26.7	31.2	37.9	24.2	14.8
0.1 P1 amp	OS	15.4	17.1	19.5	7.9	6.7
0.3 P1 amp	OS	15.8	18	18.3	7.4	6.6
1.0 P1 amp	OS	16.7	17.1	18.9	6.8	5.6
3.0 P1 amp	OS	17	16.8	20.2	8	6.5

## Sheet: Figure 5H-PI
1mpi		PI-1	PI-2	PI-3	PI-4	PI-5
0.1 P1 amp	OD	18.6	18.1	29	26.6	32.2
0.3 P1 amp	OD	20.7	19.4	31.2	26.7	32.4
1.0 P1 amp	OD	19.4	18.9	30.4	24.6	30.5
3.0 P1 amp	OD	18.9	18	26.6	23.9	27.3
0.1 P1 amp	OS	10.6	11.4	20.5	11.6	20.5
0.3 P1 amp	OS	11.9	11.7	19.2	12.8	21.1
1.0 P1 amp	OS	11.3	10.2	17.4	12	20.5
3.0 P1 amp	OS	10.6	8.7	17.4	12.6	19.6

## Sheet: Figure 5H-no treatment
goat	category	4wpi
OD 0.1cpd P1 amplitude	666	33.1
OD 0.3cpd P1 amplitude	666	35.8
OD 1.0cpd P1 amplitude	666	35.4
OD 3.0cpd P1 amplitude	666	37.5
OS 0.1cpd P1 amplitude	666	18.3
OS 0.3cpd P1 amplitude	666	20.9
OS 1.0cpd P1 amplitude	666	19.7
OS 3.0cpd P1 amplitude	666	19.1
OD 0.1cpd P1 amplitude	756	16.4
OD 0.3cpd P1 amplitude	756	16.1
OD 1.0cpd P1 amplitude	756	15.6
OD 3.0cpd P1 amplitude	756	19.1
OS 0.1cpd P1 amplitude	756	4.3
OS 0.3cpd P1 amplitude	756	4.6
OS 1.0cpd P1 amplitude	756	4.5
OS 3.0cpd P1 amplitude	756	6.8
OD 0.1cpd P1 amplitude	763	20.3
OD 0.3cpd P1 amplitude	763	19.8
OD 1.0cpd P1 amplitude	763	19.1
OD 3.0cpd P1 amplitude	763	21.3
OS 0.1cpd P1 amplitude	763	14.1
OS 0.3cpd P1 amplitude	763	14.2
OS 1.0cpd P1 amplitude	763	13.5
OS 3.0cpd P1 amplitude	763	14
OD 0.1cpd P1 amplitude	X1	18.3
OD 0.3cpd P1 amplitude	X1	17.7
OD 1.0cpd P1 amplitude	X1	17.6
OD 3.0cpd P1 amplitude	X1	13.8
OS 0.1cpd P1 amplitude	X1	8.9
OS 0.3cpd P1 amplitude	X1	12.2
OS 1.0cpd P1 amplitude	X1	10.6
OS 3.0cpd P1 amplitude	X1	9.1
OD 0.1cpd P1 amplitude	X2	4.8
OD 0.3cpd P1 amplitude	X2	5.7
OD 1.0cpd P1 amplitude	X2	5.6
OD 3.0cpd P1 amplitude	X2	6
OS 0.1cpd P1 amplitude	X2	6.5
OS 0.3cpd P1 amplitude	X2	6.9
OS 1.0cpd P1 amplitude	X2	6.4
OS 3.0cpd P1 amplitude	X2	4.8
OD 0.1cpd P1 amplitude	X6	23.3
OD 0.3cpd P1 amplitude	X6	23.9
OD 1.0cpd P1 amplitude	X6	32.4
OD 3.0cpd P1 amplitude	X6	25.8
OS 0.1cpd P1 amplitude	X6	13.2
OS 0.3cpd P1 amplitude	X6	13.1
OS 1.0cpd P1 amplitude	X6	12.6
OS 3.0cpd P1 amplitude	X6	13.2

## Sheet: Figure 5I-hypothermia+PI
OS	BANSELINE					1WPI					OS 1MPI/BASELINE
	662	663	735	769	773	662	663	735	769	773			662	663	735	769	773
NS	349	342	308	182	359	317	318	274	161	350			0.908309	0.929825	0.88961	0.884615	0.97493
N	245	263	243	202	246	240	258	214	184	228			0.979592	0.980989	0.880658	0.910891	0.926829
NI	173	205	223	225	224	165	194	200	228	196			0.953757	0.946341	0.896861	1.01333	0.875
TI	196	204	183	206	227	195	188	164	205	214			0.994898	0.921569	0.896175	0.995146	0.942731
T	196	224	247	194	229	170	200	201	174	198			0.867347	0.892857	0.813765	0.896907	0.864629
TS	273	271	372	354	265	240	242	280	333	226			0.879121	0.892989	0.752688	0.940678	0.85283

## Sheet: Figure 5I-hypothermia
OS	BANSELINE					1WPI					OS 1MPI/BASELINE
	776	802	804	805	806	776	802	804	805	806			776	802	804	805	806
NS	294	305	288	277	321	253	271	248	247	312			0.860544	0.888525	0.861111	0.891697	0.971963
N	251	197	211	186	221	238	183	181	169	202			0.948207	0.928934	0.85782	0.908602	0.914027
NI	252	233	290	213	328	242	219	249	191	309			0.960317	0.939914	0.858621	0.896714	0.942073
TI	219	208	209	169	219	202	188	181	157	217			0.922374	0.903846	0.866029	0.928994	0.990868
T	218	203	177	205	223	195	164	155	185	218			0.894495	0.807882	0.875706	0.902439	0.977578
TS	463	302	252	269	261	425	244	217	234	239			0.917927	0.807947	0.861111	0.869888	0.915709

## Sheet: Figure 5I-PI
PI1-OS	baseline	1mpi	1mpi/baseline
G	267	242	0.906367
NS	260	236	0.907692
N	265	241	0.909434
NI	264	229	0.867424
TI	237	209	0.881857
T	225	203	0.902222
TS	398	376	0.944724
PI2-OS	baseline	1mpi	1mpi/baseline
G	229	208	0.908297
NS	193	176	0.911917
N	250	232	0.928
NI	170	159	0.935294
TI	207	191	0.922705
T	202	178	0.881188
TS	355	321	0.904225
PI3-OS	baseline	1mpi	1mpi/baseline
G	251	222	0.884462
NS	265	233	0.879245
N	230	204	0.886957
NI	282	257	0.911348
TI	265	234	0.883019
T	207	181	0.874396
TS	322	279	0.86646
PI4-OS	baseline	1mpi	1mpi/baseline
G	241	222	0.921162
NS	289	273	0.944637
N	248	233	0.939516
NI	190	183	0.963158
TI	223	201	0.901345
T	230	201	0.873913
TS	274	249	0.908759
PI5-OS	baseline	1mpi	1mpi/baseline
G	280	248	0.885714
NS	437	396	0.906178
N	309	268	0.867314
NI	295	274	0.928814
TI	157	145	0.923567
T	238	209	0.878151
TS	254	218	0.858268

## Sheet: Figure 5I-no treatment
OS	baseline						1mpi							OS 1MPI/B
	X1	X2	X6	756	763	666	X1	X2	X6	756	763	666			X1	X2	X6	756	763	666
NS	335	274	395	223	255	346	277	244	322	198	230	354			0.826866	0.890511	0.81519	0.887892	0.901961	1.02312
N	217	245	228	249	214	218	185	221	204	227	197	196			0.852535	0.902041	0.894737	0.911647	0.920561	0.899083
NI	334	209	309	206	259	273	257	193	262	188	232	253			0.769461	0.923445	0.847896	0.912621	0.895753	0.92674
TI	223	208	227	247	228	231	183	201	196	221	206	221			0.820628	0.966346	0.863436	0.894737	0.903509	0.95671
T	187	207	219	220	197	228	157	181	180	190	183	202			0.839572	0.874396	0.821918	0.863636	0.928934	0.885965
TS	337	330	251	345	349	291	235	310	213	301	325	265			0.697329	0.939394	0.848606	0.872464	0.931232	0.910653

[truncated: 1 more sheets: Figure 5J]
