# Supplementary material for: Cold protection allows local cryotherapy in a clinical-relevant model of traumatic optic neuropathy
Source: eLife. 2022 Mar 30;11:e75070. doi: 10.7554/eLife.75070 (PMC9068221; doi:10.7554/eLife.75070)
Supplement: Figure 7—figure supplement 1—source data 1. [file elife-75070-fig7-figsupp1-data1.xlsx]

## Sheet: Figure S6C
monkey		baseline	1mpi	2mpi	3mpi
39	OD 0.5 P1 amplitude	10.4	10.4	10.7	16.9
39	OS 0.5 P1 amplitude	7.7	2.8	5.9	2.4
39	OD 1 P1 amplitude	5.7	13.9	11.7	16.2
39	OS 1 P1 amplitude	9	2.2	5.6	4
14	OD 0.5 P1 amplitude	7.8	13.4	11.5	23.2
14	OS 0.5 P1 amplitude	6.4	5.1	2.2	2.9
14	OD 1 P1 amplitude	4.7	14.2	5.8	15.1
14	OS 1 P1 amplitude	5.9	3.9	3.9	4.8
18	OD 0.5 P1 amplitude	13.5	6.6	18.1	12.4
18	OS 0.5 P1 amplitude	11.7	2.4	4.2	4.7
18	OD 1 P1 amplitude	13.3	7	9.4	8.6
18	OS 1 P1 amplitude	8.2	1.8	3	2.9
65	OD 0.5 P1 amplitude	15.9	13.1	13.5	9.1
65	OS 0.5 P1 amplitude	17	2.7	7.2	4.4
65	OD 1 P1 amplitude	9.6	8.2	14.4	11.6
65	OS 1 P1 amplitude	8.3	4.4	2.3	2.5

## Sheet: Figure S6D
monkey	amplitude	baseline	1mpi	2mpi	3mpi
39	OD 0.1cpd P1 amplitude	6.1	11.9	9.1	16.1
39	OS 0.1cpd P1 amplitude	9	4.9	5	4.2
39	OD 0.3cpd P1 amplitude	5.8	7.9	7	14.6
39	OS 0.3cpd P1 amplitude	5.8	3.5	1.9	1.9
39	OD 1.0cpd P1 amplitude	1.5	2.4	2.4	5.5
39	OS 1.0cpd P1 amplitude	2.2	1.9	2	1.4
14	OD 0.1cpd P1 amplitude	7.8	8.6	10.1	10.9
14	OS 0.1cpd P1 amplitude	11.6	3.8	5.1	5.7
14	OD 0.3cpd P1 amplitude	8	6.7	13	6.8
14	OS 0.3cpd P1 amplitude	12.5	2.9	3	4
14	OD 1.0cpd P1 amplitude	2.6	2.6		2.3
14	OS 1.0cpd P1 amplitude	4.9	2.1		2.4
18	OD 0.1cpd P1 amplitude	9.1	6.5	12.9	24.9
18	OS 0.1cpd P1 amplitude	10.5	2.3	7.8	4.3
18	OD 0.3cpd P1 amplitude	3.9	3.7	12.3	18.1
18	OS 0.3cpd P1 amplitude	8.8	2	4.4	4.4
18	OD 1.0cpd P1 amplitude	2.2	3.6	5	3.3
18	OS 1.0cpd P1 amplitude	3.7	3.1	2.2	2.1
65	OD 0.1cpd P1 amplitude	13.1	7.7	15.7	15.7
65	OS 0.1cpd P1 amplitude	9.7	2.9	6.8	5.9
65	OD 0.3cpd P1 amplitude	12	10	16.3	13
65	OS 0.3cpd P1 amplitude	9.3	3.1	4	5.6
65	OD 1.0cpd P1 amplitude	8.3	6.2	9.2	6.5
65	OS 1.0cpd P1 amplitude	5.4	1.5	3.2	1.2

## Sheet: Figure S6E
14-OD(20190918)	术前（20190821）	术后4W（20191016）	术后8W(20191113)	术后12W(20191211)
G	148	149	147	149
NS	168	168	154	169
N	99	103	98	101
NI	136	135	133	135
TI	227	229	227	226
T	130	130	134	131
TS	192	192	197	193
14-OS	术前（20190821）	术后4W（20191016）	术后8W(20191113)	术后12W(20191211)
G	147	88	68	65
NS	134	85	64	63
N	94	69	57	53
NI	188	120	84	77
TI	205	106	77	78
T	129	70	57	55
TS	199	119	91	88
18-OD(20190927)	术前（20190821）	2次术前（20190907）	2次术前（20190914）	术后4W（20191025）	术后8W(20191123)	术后12W(20191220
G	146	145	143	142	147	148
NS	145	151	143	141	156	150
N	99	100	100	99	99	104
NI	169	167	163	163	175	172
TI	205	194	196	193	193	198
T	137	131	134	134	135	135
TS	180	185	177	178	187	185
18-OS	术前（20190821）	2次术前（20190907）	2次术前（20190914）	术后4W（20191025）	术后8W(20191123)	术后12W(20191220
G	145	131	121	69	65	62
NS	145	131	120	70	70	63
N	103	91	83	56	55	50
NI	140	129	118	72	65	65
TI	191	177	162	89	90	82
T	138	126	117	61	55	53
TS	200	174	164	82	78	80
39-OD（20190921）	术前（20190914）	术后4W（20191018）	术后8W(20191115)	术后12W(20191212)
G	154	154	158	153
NS	167	169	173	167
N	108	104	113	106
NI	170	170	183	172
TI	210	215	214	211
T	132	133	134	130
TS	204	204	204	203
39-OS	术前（20190914）	术后4W（20191018）	术后8W(20191115)	术后12W(20191212)
G	150	102	72	67
NS	138	98	66	58
N	113	78	57	54
NI	201	140	97	86
TI	183	109	72	72
T	130	85	65	61
TS	189	141	96	87
65-OD（20190926）	术前（20190925）	术后4W（20191025）	术后8W(20191123)	术后12W(20191220)
G	147	143	143	149
NS	166	160	161	169
N	102	98	102	108
NI	178	169	170	174
TI	198	197	195	197
T	121	122	119	124
TS	186	182	180	184
65-OS	术前（20190925）	术后4W（20191025）	术后8W(20191123)	术后12W(20191220)
G	148	93	70	67
NS	175	110	90	81
N	110	75	60	55
NI	207	133	100	89
TI	182	108	64	69
T	114	70	60	59
TS	173	100	70	67

## Sheet: Figure S6F
	1mm2	Inj	S1	S2	S3	I1	I2	I3	T1	T2	T3	N1	N2	N3	mean	CL	S1	S2	S3	I1	I2	I3	T1	T2	T3	N1	N2	N3	mean
monkey TON	14	OS	11.1111	33.3333	61.1111	5.55556	11.1111	16.6667	38.8889	22.2222	38.8889	5.55556	22.2222	77.7778	28.7037	OD	1194.44	427.778	261.111	1688.89	683.333	405.556	3505.56	1255.56	188.889	688.889	911.111	1344.44	1046.3	OS/OD	0.0274336
	18	OS	5.55556	0	22.2222	11.1111	0	5.55556	0	0	44.4444	0	5.55556	0	7.87037	OD	1661.11	611.111	2366.67	1800	1483.33	388.889	0	983.333	900	2900	1127.78	877.778	1258.33	OS/OD	0.0062546
	39	OS	22.2222	50	16.6667	5.55556	5.55556	16.6667	83.3333	22.2222	27.7778	11.1111	27.7778	38.8889	27.3148	OD	1022.22	494.444	305.556	2266.67	722.222	322.222	205.556	2444.44	1238.89	1716.67	594.444	555.556	990.741	OS/OD	0.0275701

## Sheet: Figure S6G
ON density/1000um2	OD-1	OD-2	OD-3	OD-4	OS-1	OS-2	OS-3	OS-4
14	138.03	209.502	181.137	156.557	40.4635	39.4299	39.9406	31.1561
18	182.462	209.587	219.963	146.485	12.9829	11.7595	0.135556	28.701
39	221.414	132.082	109.597	122.458	23.8867	20.0453	39.9372	/*
*The quality of TEM section was poor and no data was obtained
